# Supplementary material for: Sex Difference in the Associations among Obesity-Related Indices with Incident Hypertension in a Large Taiwanese Population Follow-Up Study
Source: MDPI journal article supplement (doi:10.3390/jpm12060972), 2022-06-15
Supplement: s1 [file s1]

Supplemental Table S1. Comparison of the association of obesity-related indices with incident hypertension using different logistic regression analysis in male participants

| Obesity-related indices        | Male ( <i>n</i> = 6899)    |                         |          | Male ( <i>n</i> = 6899)        |                         |          |
|--------------------------------|----------------------------|-------------------------|----------|--------------------------------|-------------------------|----------|
|                                | Multivariable <sup>#</sup> |                         |          | Multivariable <sup>a,b,c</sup> |                         |          |
|                                | OR                         | 95% confidence interval | <i>p</i> | OR                             | 95% confidence interval | <i>p</i> |
| BMI (per 1 kg/m <sup>2</sup> ) | 1.118 <sup>#</sup>         | 1.095-1.141             | < 0.001  | 1.107 <sup>a</sup>             | 1.083-1.131             | < 0.001  |
| WHR (per 0.01)                 | 1.047 <sup>#</sup>         | 1.034-1.060             | < 0.001  | 1.038 <sup>a</sup>             | 1.024-1.051             | < 0.001  |
| WHtR (per 0.01)                | 1.070 <sup>#</sup>         | 1.056-1.084             | < 0.001  | 1.062 <sup>a</sup>             | 1.048-1.077             | < 0.001  |
| BRI (per 1)                    | 1.217 <sup>#</sup>         | 1.170-1.266             | < 0.001  | 1.190 <sup>a</sup>             | 1.141-1.241             | < 0.001  |
| CI (per 0.1)                   | 1.324 <sup>#</sup>         | 1.195-1.467             | < 0.001  | 1.237 <sup>a</sup>             | 1.112-1.375             | < 0.001  |
| BAI (per 1)                    | 1.094 <sup>#</sup>         | 1.072-1.117             | < 0.001  | 1.084 <sup>a</sup>             | 1.061-1.107             | < 0.001  |
| AVI (per 1)                    | 1.106 <sup>#</sup>         | 1.082-1.130             | < 0.001  | 1.092 <sup>a</sup>             | 1.068-1.117             | < 0.001  |
| LAP (per 1)                    | 1.006 <sup>#</sup>         | 1.004-1.008             | < 0.001  | 1.008 <sup>b</sup>             | 1.005-1.111             | < 0.001  |
| VAI (per 1)                    | 1.069 <sup>#</sup>         | 1.034-1.104             | < 0.001  | 1.084 <sup>c</sup>             | 1.041-1.128             | < 0.001  |

Values expressed as odds ratio (OR) and 95% confidence interval. Abbreviations are the same as in Table 1.

<sup>#</sup>Covariates in the multivariable model included age, smoking and alcohol history, regular exercise habits, hemoglobin, eGFR and uric acid for BMI, WHR, WHtR, BRI, CI. BAI, AVI, LAP and VAI.

<sup>a</sup>Covariates in the multivariable model included age, diabetes, smoking and alcohol history, regular exercise habits, fasting glucose, hemoglobin,

triglyceride, total cholesterol, HDL-cholesterol, LDL-cholesterol, eGFR and uric acid for BMI, WHR, WHtR, BRI, CI, BAI and AVI.

<sup>b</sup>Covariates in the multivariable model included age, diabetes, smoking and alcohol history, regular exercise habits, fasting glucose, hemoglobin, total cholesterol, HDL-cholesterol, LDL-cholesterol, eGFR and uric acid for LAP.

<sup>c</sup>Covariates in the multivariable model included age, diabetes, smoking and alcohol history, regular exercise habits, fasting glucose, hemoglobin, total cholesterol, LDL-cholesterol, eGFR and uric acid for VAI.

Supplemental Table S2. Comparison of the association of obesity-related indices with incident hypertension using different logistic regression analysis in female participants

| Obesity-related indices        | Female ( <i>n</i> = 14,567) |                         |          | Female ( <i>n</i> = 14,567)    |                         |          |
|--------------------------------|-----------------------------|-------------------------|----------|--------------------------------|-------------------------|----------|
|                                | Multivariable <sup>#</sup>  |                         |          | Multivariable <sup>a,b,c</sup> |                         |          |
|                                | OR                          | 95% confidence interval | <i>p</i> | OR                             | 95% confidence interval | <i>p</i> |
| BMI (per 1 kg/m <sup>2</sup> ) | 1.133 <sup>#</sup>          | 1.115-1.151             | < 0.001  | 1.119 <sup>a</sup>             | 1.101-1.137             | < 0.001  |
| WHR (per 0.01)                 | 1.035 <sup>#</sup>          | 1.027-1.044             | < 0.001  | 1.027 <sup>a</sup>             | 1.018-1.035             | < 0.001  |
| WHtR (per 0.01)                | 1.061 <sup>#</sup>          | 1.052-1.071             | < 0.001  | 1.053 <sup>a</sup>             | 1.043-1.062             | < 0.001  |
| BRI (per 1)                    | 1.197 <sup>#</sup>          | 1.164-1.232             | < 0.001  | 1.166 <sup>a</sup>             | 1.131-1.201             | < 0.001  |
| CI (per 0.1)                   | 1.144 <sup>#</sup>          | 1.076-1.217             | < 0.001  | 1.095 <sup>a</sup>             | 1.028-1.166             | 0.005    |
| BAI (per 1)                    | 1.086 <sup>#</sup>          | 1.071-1.102             | < 0.001  | 1.078 <sup>a</sup>             | 1.062-1.093             | < 0.001  |
| AVI (per 1)                    | 1.108 <sup>#</sup>          | 1.090-1.128             | < 0.001  | 1.090 <sup>a</sup>             | 1.071-1.110             | < 0.001  |
| LAP (per 1)                    | 1.008 <sup>#</sup>          | 1.006-1.010             | < 0.001  | 1.010 <sup>b</sup>             | 1.007-1.013             | < 0.001  |
| VAI (per 1)                    | 1.083 <sup>#</sup>          | 1.053-1.115             | < 0.001  | 1.095 <sup>c</sup>             | 1.062-1.128             | < 0.001  |

Values expressed as odds ratio (OR) and 95% confidence interval. Abbreviations are the same as in Table 1.

<sup>#</sup>Covariates in the multivariable model included age, smoking and alcohol history, regular exercise habits, hemoglobin, eGFR and uric acid for BMI, WHR, WHtR, BRI, CI. BAI, AVI, LAP and VAI.

<sup>a</sup>Covariates in the multivariable model included age, diabetes, smoking and alcohol history, regular exercise habits, fasting glucose, hemoglobin,

triglyceride, total cholesterol, HDL-cholesterol, LDL-cholesterol, eGFR and uric acid for BMI, WHR, WHtR, BRI, CI. BAI and AVI.

<sup>b</sup>Covariates in the multivariable model included age, diabetes, smoking and alcohol history, regular exercise habits, fasting glucose, hemoglobin, total cholesterol, HDL-cholesterol, LDL-cholesterol, eGFR and uric acid for LAP.

<sup>c</sup>Covariates in the multivariable model included age, diabetes, smoking and alcohol history, regular exercise habits, fasting glucose, hemoglobin, total cholesterol, LDL-cholesterol, eGFR and uric acid for VAI.
